# Supplementary material
Source: PubMed Central journal article supplement (PMC5693355)
Supplement: NIHMS887576-supplement-Supplemental_Material.pdf [file NIHMS887576-supplement-Supplemental_Material.pdf]

## Supplementary figure I.

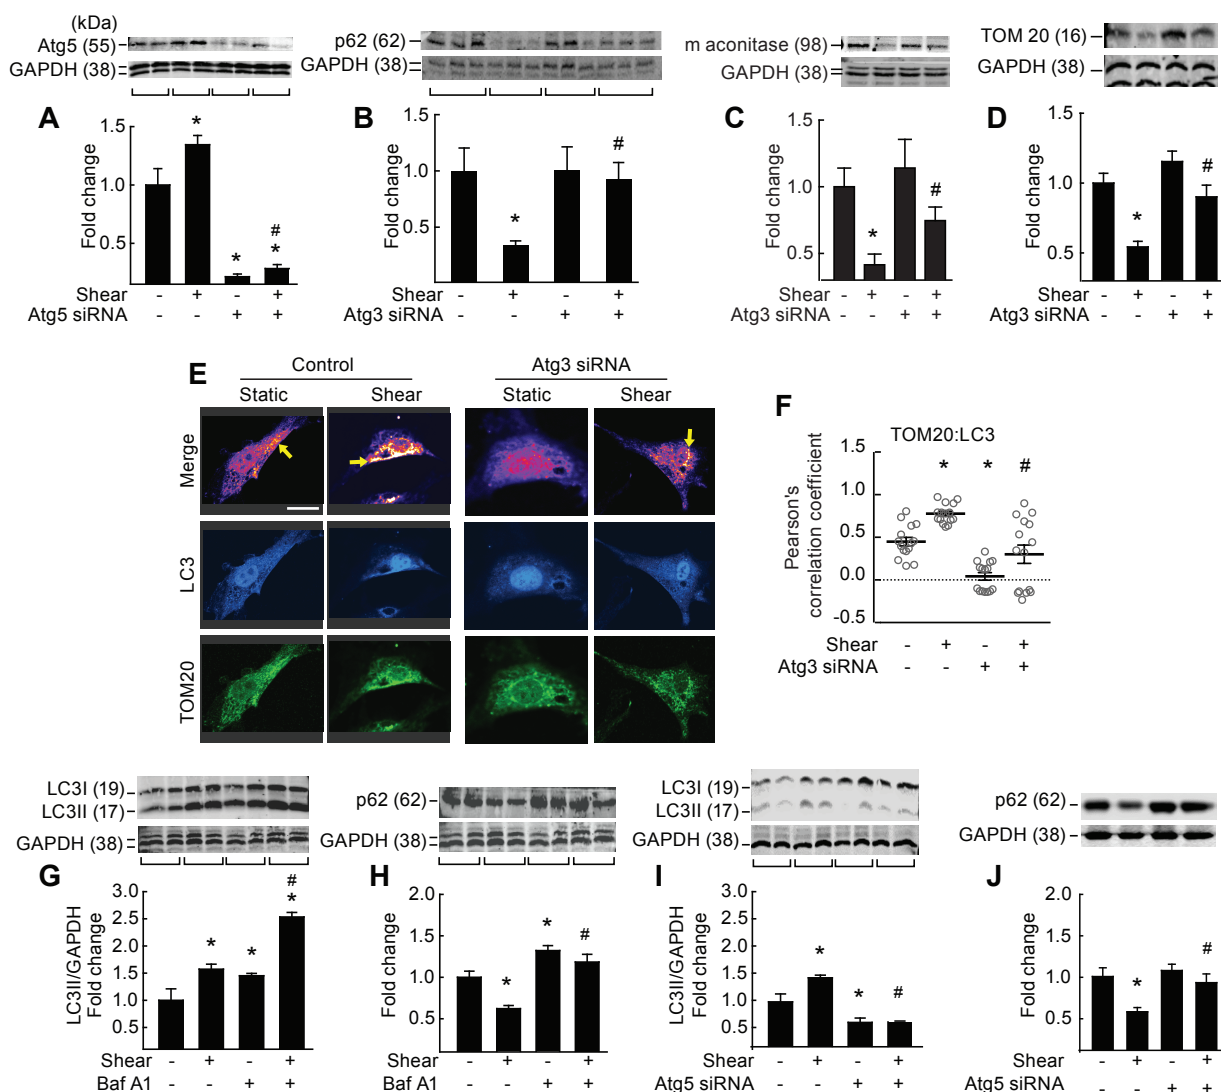

**Supplementary Figure I. Genetic disruption of Atg3 and Atg5 protein limits shear-stress induced autophagy and mitophagy.** Relative to static conditions, shear-stress increased Atg5 protein expression (**A**), promoted degradation of p62 (**B, H, J**), m-aconitase (**C**) and TOM 20 (**D**), evoked LC3 II accumulation (**G, I**), and increased colocalization of TOM20 with LC3 (**E, F**), in ECs transfected with scrambled siRNA (bar 1 vs. 2). Each response was prevented in ECs after Atg5 or Atg3 siRNA (bar 3 vs. 4). Images shown in **E** represent mean data shown in **F**. Fluorescence images in **E** were individually adjusted to maximize clarity. Calibration bar = 21  $\mu$ m. Shear-induced LC3 II accumulation in the absence of Baf A1 (**G**; bar 1 vs. 2) was exacerbated by Baf A1 (bar 3 vs. 4). Shear-induced p62 degradation in the absence of Baf A1 (**H**; bar 1 vs. 2) was prevented by Baf A1 (bar 3 vs. 4). For **A, C-J** (n=6-8, each n = 1 x 10 cm petri dish). For **B** (n=20-30, each n = 1 x 10 cm petri dish). For **E, F**, 5 fields x 5 cells per field were imaged. \*p<0.05 vs. (-shear)(-Atg5 or Atg3 siRNA); # p<0.05 vs. (+shear)(-Atg3 or Atg5 siRNA). The siRNA sequences are shown in Table 1.

Supplementary figure II.

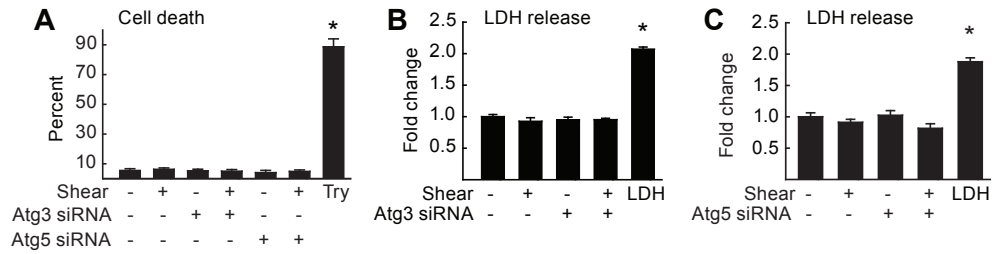

**Supplementary Figure II. Neither Atg3 nor Atg5 siRNA adversely affect cell viability.** Cell counting (**A**), and lactate dehydrogenase (LDH) release (**B, C**) indicate that neither shear stress nor Atg3/5 siRNA adversely affect cell viability. For A (n=6-8), B, C (n=5), each n=1 well of a 6-well plate. \*p<0.05 vs. (-shear)(-Atg3 siRNA) or (-shear)(-Atg5 siRNA).

Supplementary figure III.

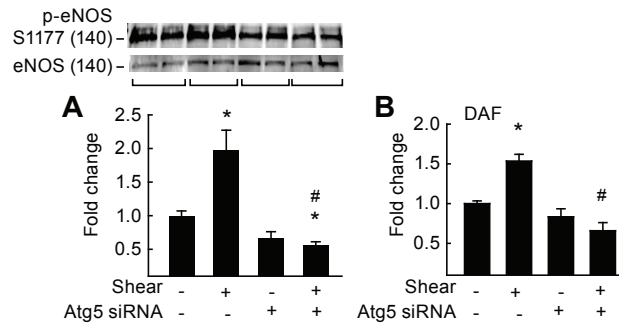

**Supplementary Figure III. Genetic disruption of Atg5 prevents shear-stress induced eNOS activation and NO generation.** Relative to static conditions, shear-stress increased p-eNOS<sup>S1177</sup> (**A**) and NO generation (**B**) in ECs transfected with scrambled siRNA (bar 1 vs. 2) but not Atg5 siRNA (bar 3 vs. 4). For A, B, n=6, each n= 1 x 10 cm petri dish. \*p<0.05 vs. (-shear)(-Atg5 siRNA); #p<0.05 vs. (+shear)(-Atg5 siRNA).

Supplementary figure IV.

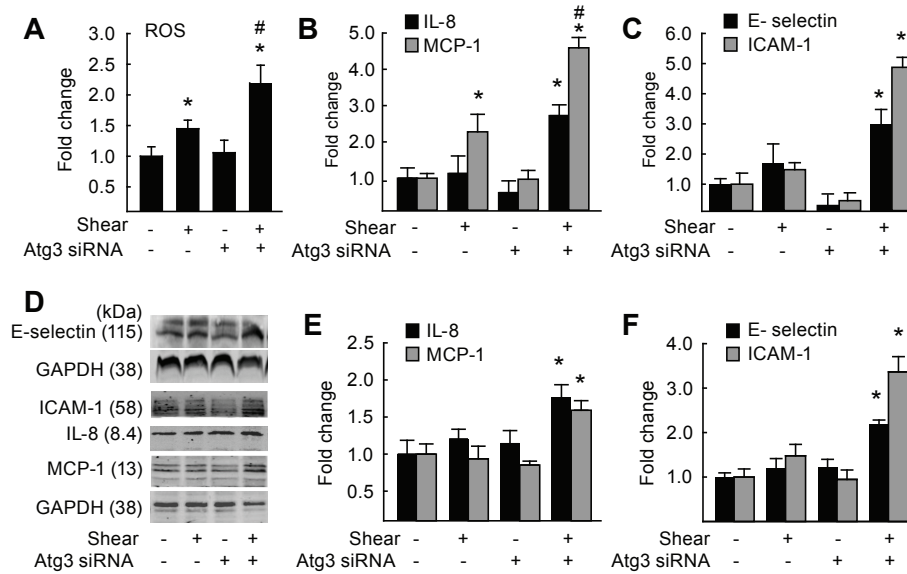

**Supplementary Figure IV. Genetic disruption of Atg3 exaggerates shear-stress evoked ROS generation and inflammation.** Relative to static conditions, shear-stress increased reactive oxygen species (ROS) accumulation (bar 1 vs. 2) (**A**) and MCP-1 mRNA (bar 2 vs. 4) (**B**) in ECs transfected with scrambled siRNA. In ECs transfected with Atg3 siRNA, shear-stress evoked ROS generation (**A**) (bar 2 vs. 4) and MCP-1 mRNA (**B**) (bar 4 vs. 8) was exaggerated. Shear stress increased IL-8 (**B**; bar 3 vs. 7), E-selectin (**C**; bar 3 vs. 7), and ICAM-1 (**C**; bar 4 vs. 8) in ECs only after Atg3 siRNA. Shear stress increased IL-8 and MCP-1 protein expression (**E**; bars 3,4 vs. 7,8), and E-selectin and ICAM-1 protein expression (**F**; bars 3,4 vs. 7,8), only in ECs after Atg3 siRNA. The image shown in **D** represents mean data displayed in **E** and **F**. For A (n=10), B-F (n=5). For A, each n = 1 well of a 6-well plate; B-F, each n = 1 x 10 cm petri dish. \*p<0.05 vs. (-shear)(-Atg3 siRNA); #p<0.05 vs. (+shear)(-Atg3 siRNA). Primer sequences are shown in Table 3.

Supplementary figure V.

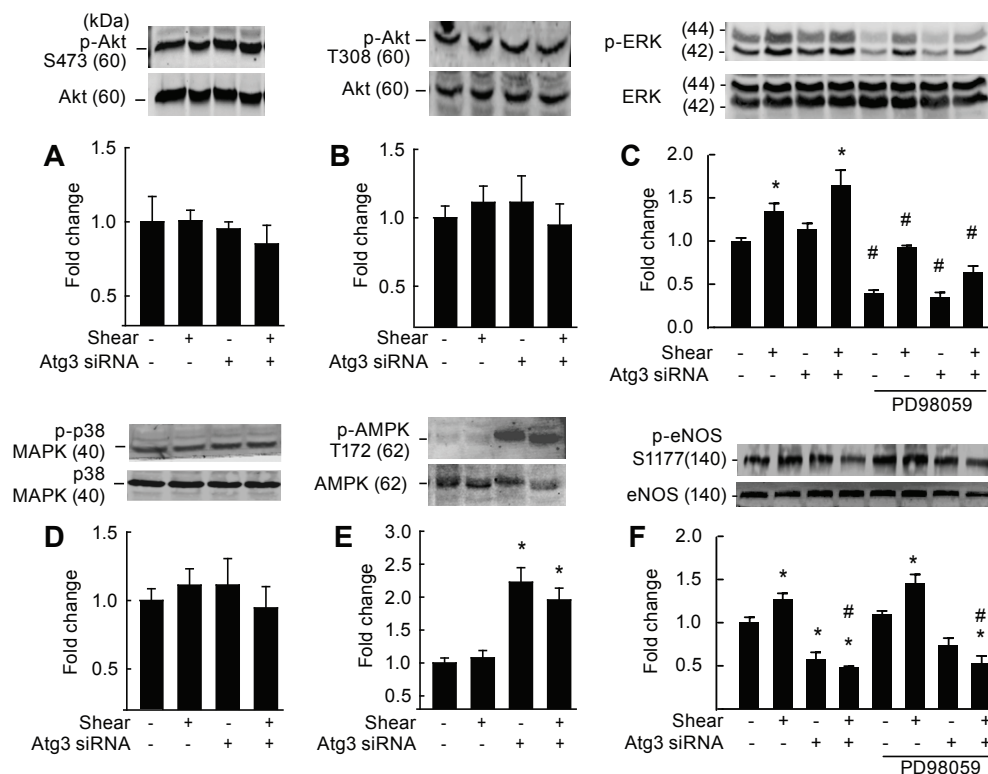

**Supplementary Figure V. Genetic disruption of Atg3 does not dysregulate shear-evoked Akt, ERK<sup>1/2</sup>, or p38MAPK signaling to eNOS.** Relative to shear-stress in ECs transfected with scrambled siRNA, 180-min shear-stress did not alter phosphorylation of Akt (**A, B**), ERK<sup>1/2</sup> (**C**), or p38MAPK (**D**) in ECs transfected with Atg3 siRNA. However, Atg3 siRNA *per se* did increase phosphorylation of AMPK (**E**). Even though the shear-induced elevation of p-ERK<sup>1/2</sup> : ERK after Atg3 siRNA was not significant (**C**, bar 2 vs. 4), we wanted to be certain that it did not contribute to suppressed p-eNOS<sup>S1177</sup> (**F**, bar 2 vs. 4). MEK inhibition using 20 uM PD98059 lowered p-ERK<sup>1/2</sup> in ECs with intact autophagy (**C**, histograms 5,6), but did not influence shear-induced p-eNOS<sup>S1177</sup> : eNOS (**F**, histograms 5,6). For A, B, D, E (n=8), for C, F (n=5, each n = 1 x 10 cm petri dish). \*p<0.05 vs. (-shear)(-Atg3 siRNA). **C** #p< 0.05 vs. corresponding condition (-PD98059). **F** #p<0.05 vs. (+shear)(-Atg3 siRNA).

Supplementary figure VI.

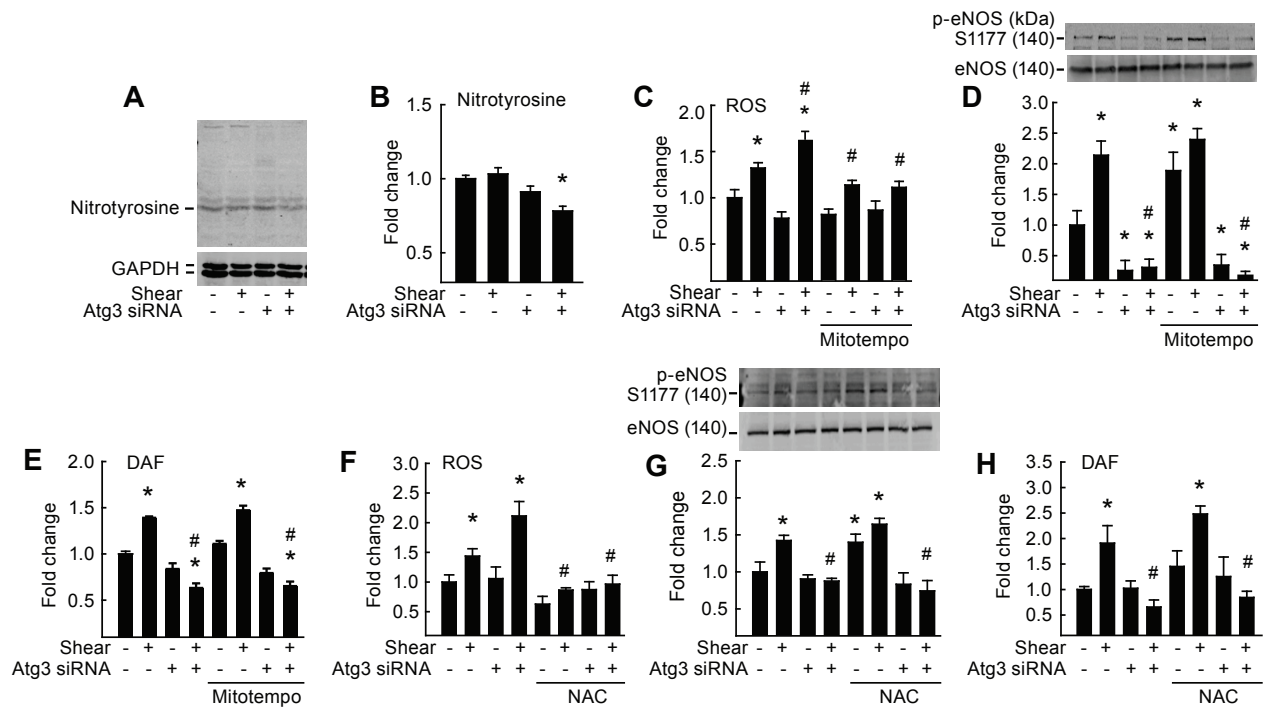

**Supplementary Figure VI. Suppressed shear-stress induced eNOS activation after Atg3 siRNA is not secondary to exaggerated ROS generation.** Nitrotyrosine protein abundance was less in ECs exposed to 20 dynes/cm<sup>2</sup> x 3 h in the presence vs. the absence of Atg3 siRNA (bar 2 vs. 4). The image in **A** represents mean data shown in **B**. Shear-stress induced ROS generation was exacerbated in the presence vs. the absence of Atg3 siRNA (bar 2 vs. 4) (**C, F**). While exaggerated ROS production after Atg3 siRNA was suppressed by Mito-tempo (**C**) or NAC (**F**) (bar 4 vs. bar 8), neither p-eNOS<sup>S1177</sup> (**D, G**) nor NO generation (**E, H**) were restored. For B, D, G (n=5, each n = 1 x 10 cm petri dish), C, E, F, H (n=8-10, each n= 1 well of a 6-well plate). \*p<0.05 vs. (-shear)(-Atg3 siRNA). # p<0.05 vs. (+shear)(-Atg3 siRNA).

Supplementary figure VII.

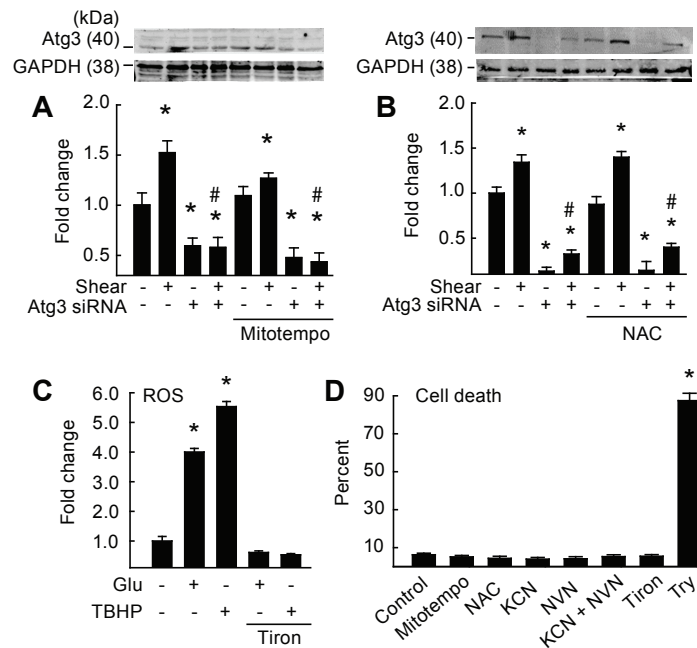

**Supplementary Figure VII. ROS inhibition does not influence shear-mediated autophagy.**

ECs were treated  $\pm 20$  dynes/cm<sup>2</sup>  $\pm$  Atg3 siRNA  $\pm$  ROS inhibition using mitotempo (**A**) or NAC (**B**). Neither mitotempo nor NAC altered the ability of shear stress to increase Atg3 protein expression (**A, B**; bar 5 vs. 6) or the ability of Atg3 siRNA to negate shear-induced Atg3 protein expression (**A, B**; bar 7 vs. 8). Sensitivity of the DCFDA assay was illustrated by treating cells with the ROS generators glucose (glu, 100 mM) or tert butyl hydrogen peroxide (TBHP, 50  $\mu$ M). ROS generation evoked by Glu or TBHP was negated by concurrent treatment with the intracellular superoxide anion scavenger tiron (5 mM)(**C**). Treatment of ECs with ROS scavengers used in our study did not adversely affect cell viability (**D**). For A, B (n=5), C (n=10-12), D (n=16 for each compound). For A, B (each n = 1 x 10 cm petri dish), C, D (each n = 1 well of a 6-well plate). For A, B, \*p<0.05 vs. (-shear)(-Atg3 siRNA); # p<0.05 vs. (+shear)(-Atg3 siRNA). For C \*p<0.05 vs. (-Glu)(-TBHP). For D \* p<0.05 vs. control.

Supplementary figure VIII.

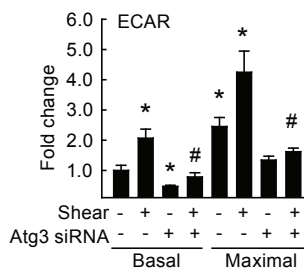

**Supplementary Figure VIII. Genetic disruption of Atg3 impairs basal and maximal extracellular acidification rate in ECs exposed to shear stress.** ECs were treated  $\pm 20$  dynes/cm<sup>2</sup>  $\pm$  Atg3 siRNA. Under basal conditions, shear-stress increased the extracellular acidification rate (ECAR) in ECs transfected with scrambled (bar 1 vs. 2) but not Atg3 siRNA (bar 3 vs. 4). Under maximal conditions, shear-stress increased ECAR in ECs transfected with scrambled (bar 5 vs. 6) but not Atg3 siRNA (bar 7 vs. 8). n=3, each n = 1 Seahorse plate. \*p<0.05 vs. (-shear)(-Atg3 siRNA); #p<0.05 vs. (+shear)(-Atg3 siRNA).



Supplementary figure IX.

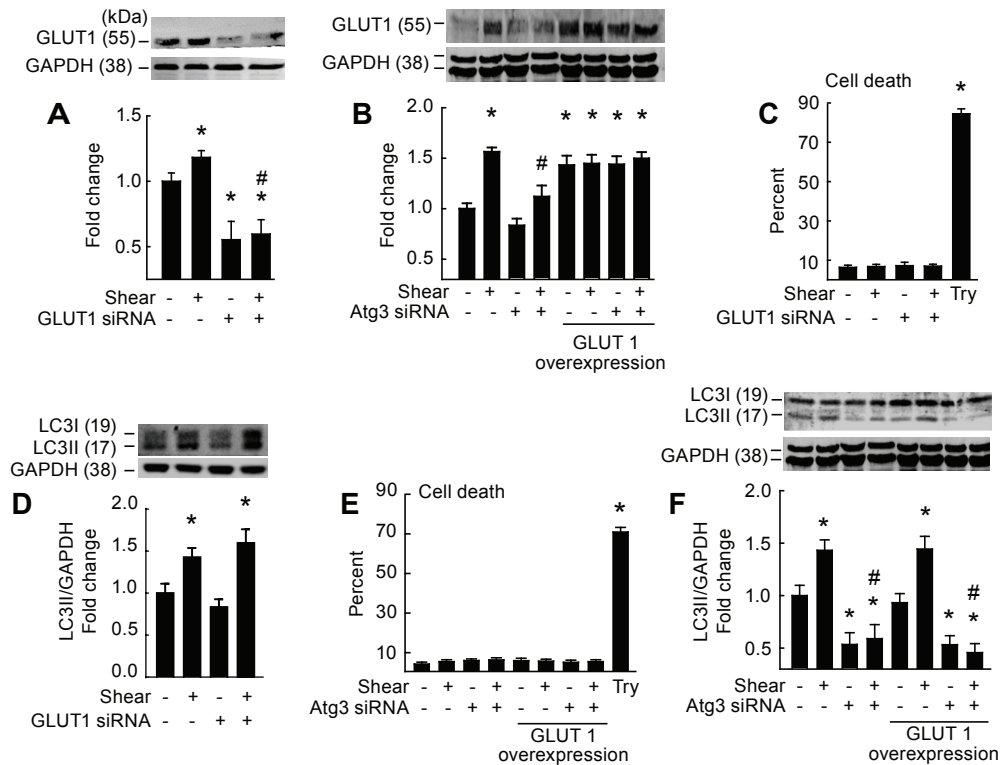

**Supplementary Figure IX. Neither GLUT1 siRNA nor GLUT1 overexpression influence cell viability or autophagy.** Shear-stress increased GLUT1 protein expression in ECs transfected with scrambled siRNA (**A, B**, bar 1 vs. 2) but not GLUT1 siRNA (**A**) or Atg3 siRNA (**B**; bar 3 vs. 4). Co-transfection with a plasmid vector for GLUT1 increased GLUT1 expression in ECs ± Atg3 siRNA (**B**; bars 5-8). GLUT1 siRNA does not evoke cell death (**C**) and does not influence the ability of shear stress to increase autophagy (**D**). GLUT1 overexpression in ECs ± Atg3 siRNA does not influence cell death (**E**), the ability of shear stress to increase LC3 II accumulation (**F**; bar 5 vs. 6), or the ability of Atg3 siRNA to suppress shear-induced LC3 II accumulation (**E**; bar 7 vs. 8). A, B, D, F (n=8), C, E (n=6). For A,B,F (each n = 1 x 10 cm petri dish), C, D, E (each n = 1 well of a 6-well plate). For A, B-F \*p<0.05 vs. (-shear)(-Atg3 siRNA); # p<0.05 vs. (+shear)(-Atg3 siRNA). For C, E \*p<0.05 vs. (-shear)(-GLUT1 or Atg3 siRNA). siRNA sequences are shown in Table 1.

Supplementary figure X.

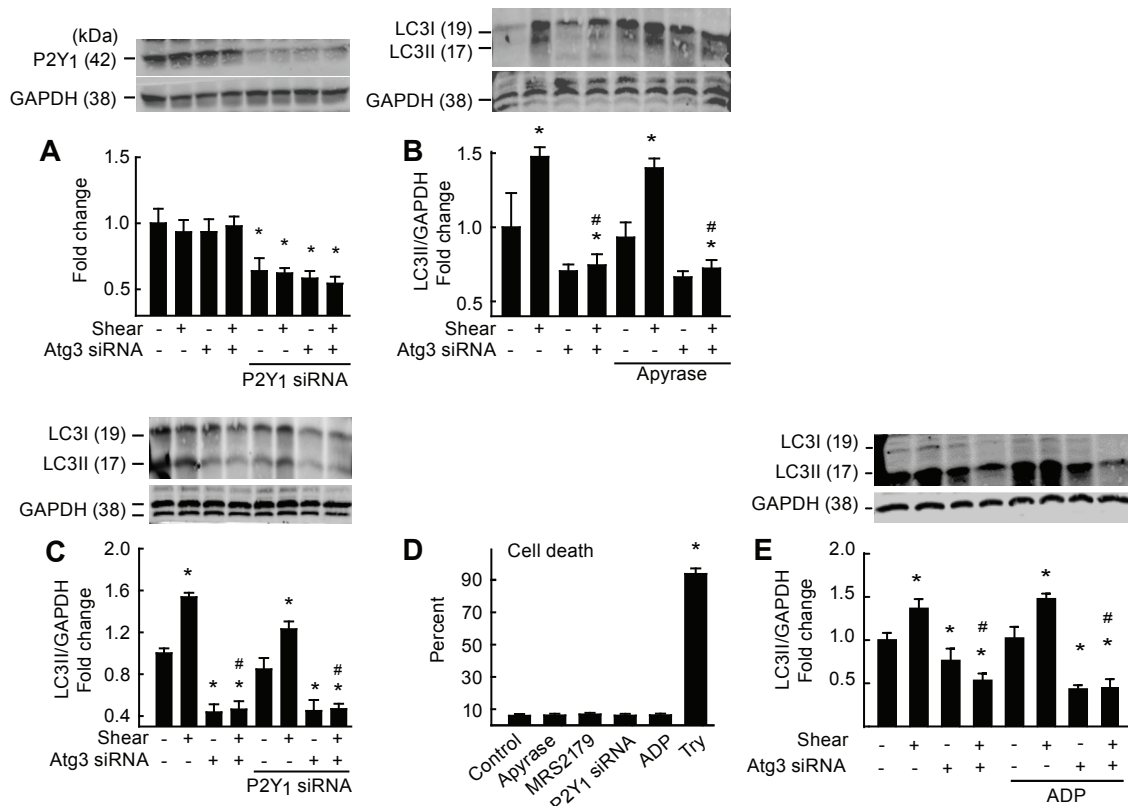

**Supplementary Figure X. Manipulation of purinergic signaling does not alter cell viability or autophagy.** Exposure of ECs to 20 dynes/cm<sup>2</sup> shear stress ± Atg3 siRNA x 3 h does not influence P2Y1-R protein expression (**A**; bars 1-4). Transfection of ECs with P2Y1-R siRNA resulted in effective protein silencing ± 20 dynes/cm<sup>2</sup> shear stress ± Atg3 siRNA (**A**; bars 5-8). Shear-stress increases LC3 II accumulation in ECs transfected with scrambled but not Atg3 siRNA (**B**, **C**, **E**; bars 1-4), and this response is not affected in ECs treated with apyrase (**B**; bars 5-8), P2Y1 siRNA (**C**; bars 5-8), or ADP (**E**; bars 5-8). Treating ECs with apyrase, MRS2179, P2Y1-R siRNA, or ADP does not alter cell death (**D**). For A-C (n=4-5, each n = 1 x 10 cm petri dish). For D (n=16, each n = 1 well of a 6 well plate). For E (n=5, each n = 1 x 10 cm petri dish). For A-C, E \*p<0.05 vs. (-shear) (-Atg3 siRNA); #p<0.05 vs. (+shear)(-Atg3 siRNA). For D \*p<0.05 vs. control.

Supplementary figure XI.

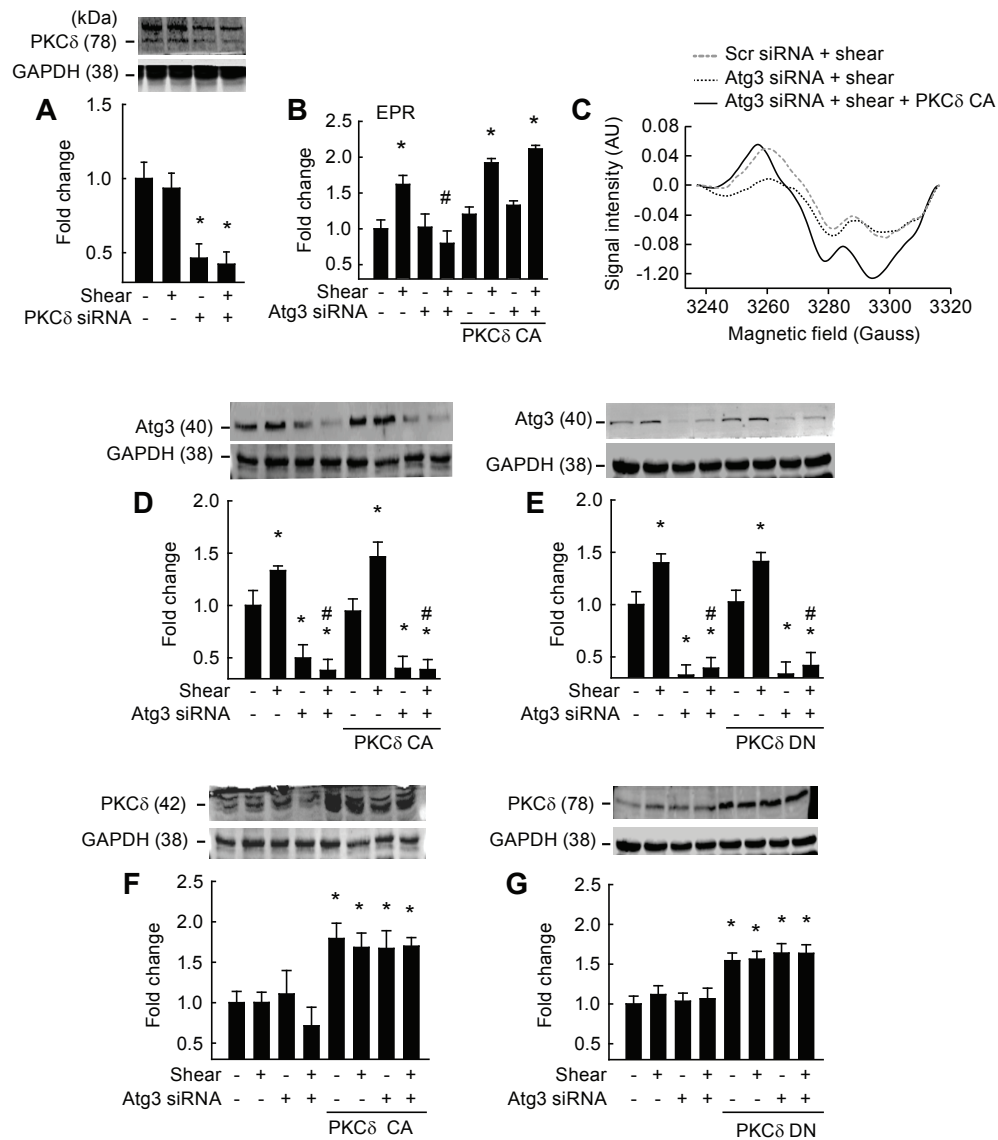

**Supplementary Figure XI. Manipulating PKCδ does not alter shear-induced LC3 II accumulation or evoke cell death.** Transfection of ECs with PKCδ siRNA resulted in efficacious protein silencing ± 20 dynes/cm<sup>2</sup> shear stress (bars 1-2 vs. 3-4) (**A**). Relative to static conditions, shear-stress increased NO generation (**B,C**) in ECs transfected with scrambled siRNA (**B**; bar 1 vs. 2) but not Atg3 siRNA (**B**; bar 3 vs. 4). Suppressed shear-induced NO generation (**B,C**) after Atg3 siRNA (**B**; bar 3 vs. 4) was restored in ECs co-transfected with constitutively active (CA) PKCδ (**B**; bar 7 vs. 8). Images shown in C represent the respective mean data shown in B. Atg3 protein expression ± shear stress ± Atg3 siRNA was not altered by CA-PKCδ (**D**) or DN- PKCδ (**E**). Transfection of ECs with CA-PKCδ (**F**) and DN- PKCδ (**G**) resulted in effective protein expression. For A, D-G (n=5, each n = 1 x 10 cm petri dish). For B, C (n=6, each n = 3 wells of a 6-well plate). \*p<0.05 vs. (-shear)(-Atg3 siRNA); #p<0.05 vs. (+shear)(-Atg3 siRNA).

Supplementary figure XII.

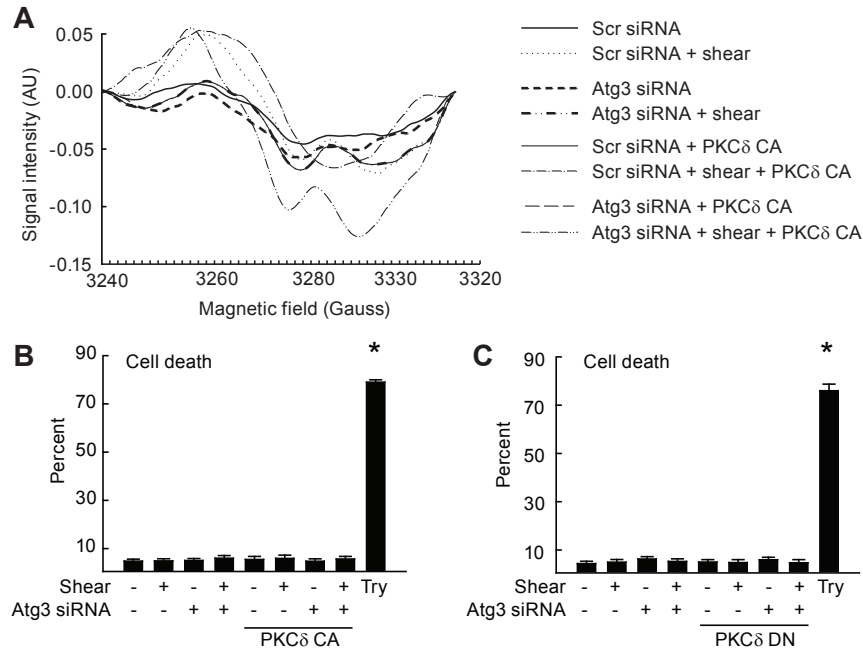

**Supplementary Figure XII. Expression of CA-PKCδ restores shear-induced NO generation in ECs with compromised autophagy.** ECs were grown to 50-70% confluency in 6-well plates and were treated  $\pm$  shear  $\pm$  Atg3 siRNA  $\pm$  CA-PKCδ or DN-PKCδ. All treatments contained L-arginine and the spin trap FeSO<sub>4</sub>+ sodium diethyldithiocarbamate trihydrate (DETC; Noxygen Science Transfer Diagnostics, Denzlingen, Germany). After the respective treatments, ECs were gently dislodged from each plate, collected in a 1 ml syringe, and frozen in liquid nitrogen after an aliquot was obtained to determine protein content of the sample. At the time of analysis, frozen samples were loaded in a finger dewar with liquid nitrogen, and scanned using the EMXmicro EPR Spectrometer (Bruker Biospin Corporation, Billerica, MA) at the following settings: microwave frequency: 9.35 GHz; centerfield: 3277 G; sweep width: 80 G; sweep time: 10.0 s; receiver gain: 30 dB; modulation amplitude: 9 G; # scans: 10; attenuation: 10 dB; power: 20 mW; digital filter: manual mode with 1 point; conversion time: 112.36 ms; and time constant: 10.24 ms. All values were normalized to protein content. ECs treated with 500  $\mu$ M of 2-(N,N-Diethylamino)-diazene-2-oxide diethylammonium salt (DEA NoNoate) a NO donor, were used as a positive control and cells treated with 500  $\mu$ M of L-N<sup>G</sup>-monomethyl Arginine citrate (LNMMA) a NOS inhibitor were used as a negative control. EPR images from each treatment are displayed **(A)**. Cell viability was not altered among the different treatments after expression of either CA PKCδ **(B)** or DN PKCδ **(C)**. For A-C (n=6). For A (each n = 3 wells of a 6-well plate), B, C (each n = 1 well of a 6-well plate). \*p<0.05 vs. (-shear)/(-Atg3 siRNA).

Supplementary figure XIII.

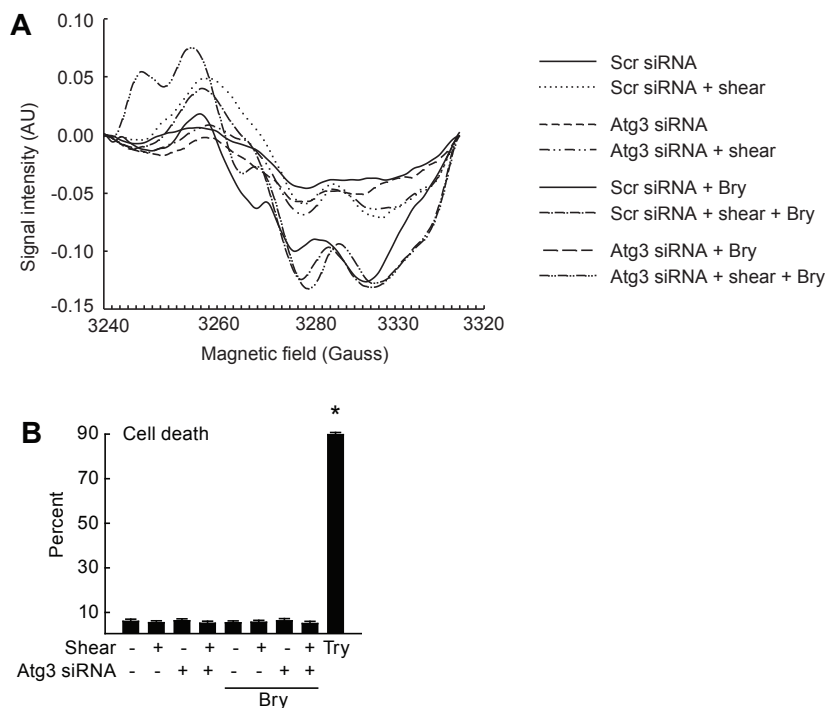

**Supplementary Figure XIII. Pharmacological activation of PKC $\delta$  restores shear-induced NO generation in ECs with compromised autophagy.** ECs were grown as described in legend to Supplementary Figure XII, and treated  $\pm$  shear  $\pm$  Atg3 siRNA  $\pm$  bryostatin-1 (Bry). EPR images from each treatment are displayed (A). Cell viability (B) was not altered by bry. For A, B (n=6). For A (each n = 3 wells of a 6-well plate), B (each n = 1 well of a 6-well plate). \*p<0.05 vs. (-shear)(-Atg3 siRNA).

Supplementary figure XIV.

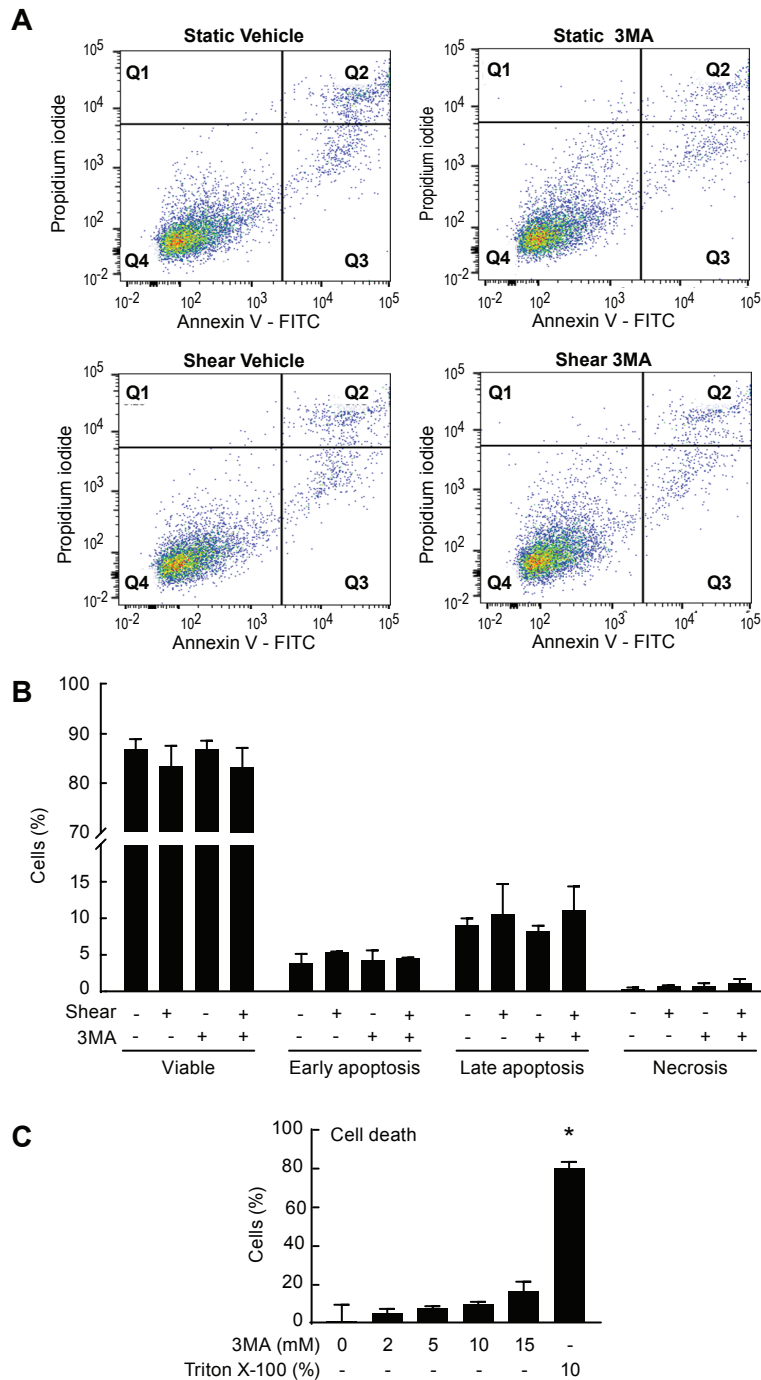

**Supplementary Figure XIV. Pharmacological inhibition of autophagy does not influence cell death or apoptosis in human arterial endothelial cells.** Human arterial endothelial cells (HAECs) were treated  $\pm$  shear-stress  $\pm$  5 mM 3MA for 3 h. Images of HAECs estimated to be: (i) necrotic (Quadrant 1; Q1); (ii) undergoing late (Q2) or (iii) early (Q3) apoptosis; or (iv) viable (Q4) are shown in **A**. Mean data of images shown in **A** are displayed in **B**. No differences were observed among groups. An additional cytotoxicity assay indicated that 3 h x 0, 2, 5, 10 or 15 mM 3MA for 3h does not influence cell death (**C**). 10% Triton X-100 served as a positive control. \* $p < 0.05$  vs. 0 mM 3MA. For **A**, **B** ( $n = 3$ , each  $n = 2$  wells of a 6 well). For **C** ( $n = 3$ , each  $n = 3$  wells of a 96 well plate).
